# Supplementary material for: Association between Daytime Sleepiness, Fatigue and Autonomic Responses during Head-Up Tilt Test in Multiple Sclerosis Patients
Source: MDPI journal article supplement (doi:10.3390/brainsci13091342), 2023-09-19
Supplement: s1 [file s1]

**Table S1.** Relationships between Daily Sleepiness, Fatigue Symptoms and cardiac autonomic parameters.

| Variable                                                          | CFQ Score |                 | ESS Score |                 |
|-------------------------------------------------------------------|-----------|-----------------|-----------|-----------------|
|                                                                   | R         | <i>p</i> -Value | R         | <i>p</i> -Value |
| CFQ [score]                                                       | -0.03     | 0.826           | 0.17      | 0.212           |
| EDSS                                                              | 0.27      | <b>0.04</b>     | -0.11     | 0.402           |
| Disease duration [years]                                          | 0.09      | 0.517           | -0.11     | 0.416           |
| Age [years]                                                       | 0.01      | 0.947           | -0.33     | <b>0.011</b>    |
| ESS [score]                                                       | 0.17      | 0.212           |           |                 |
| HR [1/min]                                                        | -0.2      | 0.137           | -0.18     | 0.165           |
| sBP [mmHg]                                                        | 0.14      | 0.288           | -0.1      | 0.46            |
| dBp [mmHg]                                                        | 0.05      | 0.698           | -0.15     | 0.264           |
| mBP, [mmHg]                                                       | 0.09      | 0.515           | -0.14     | 0.296           |
| CI [L/(min·m <sup>2</sup> )]                                      | -0.07     | 0.58            | 0.18      | 0.182           |
| TPRI [dyn·s·m <sup>2</sup> /cm <sup>5</sup> ]                     | 0.1       | 0.439           | -0.2      | 0.141           |
| LFnu-RRI [%]                                                      | -0.21     | 0.105           | -0.17     | 0.215           |
| HFnu-RRI [%]                                                      | 0.22      | 0.099           | 0.16      | 0.217           |
| PSD-RRI [ms <sup>2</sup> ]                                        | 0.09      | 0.496           | 0.21      | 0.113           |
| LF/HF-RRI [1]                                                     | -0.23     | 0.088           | -0.18     | 0.175           |
| LF/HF [1]                                                         | -0.17     | 0.195           | -0.28     | <b>0.033</b>    |
| LFnu-dBP [%]                                                      | -0.05     | 0.705           | -0.32     | <b>0.013</b>    |
| HFnu-dBP [%]                                                      | 0.13      | 0.324           | 0.23      | 0.08            |
| PSD-dBP [mmHg <sup>2</sup> ]                                      | -0.16     | 0.244           | -0.04     | 0.786           |
| LFnu-sBP [%]                                                      | -0.2      | 0.127           | -0.42     | <b>0.001</b>    |
| HFnu-sBP [%]                                                      | 0.04      | 0.738           | 0.17      | 0.201           |
| PSD-sBP [mmHg <sup>2</sup> ]                                      | -0.02     | 0.886           | -0.24     | 0.073           |
| BRS [ms/mmHg]                                                     | -0.03     | 0.826           | 0.23      | 0.093           |
| ΔPHASE <sub>1</sub> HR [1/min]                                    | 0.14      | 0.307           | 0.14      | 0.297           |
| ΔPHASE <sub>1</sub> sBP [mmHg]                                    | -0.03     | 0.813           | 0.07      | 0.623           |
| ΔPHASE <sub>1</sub> dBP [mmHg]                                    | -0.05     | 0.711           | 0.01      | 0.961           |
| ΔPHASE <sub>1</sub> mBP [mmHg]                                    | -0.05     | 0.711           | 0.03      | 0.828           |
| ΔPHASE <sub>1</sub> CI [L/(min·m <sup>2</sup> )]                  | 0.05      | 0.706           | -0.12     | 0.371           |
| ΔPHASE <sub>1</sub> TPRI [dyn·s·m <sup>2</sup> /cm <sup>5</sup> ] | 0.1       | 0.463           | 0.04      | 0.761           |
| ΔPHASE <sub>1</sub> LFnu-RRI [%]                                  | 0.07      | 0.599           | 0.17      | 0.204           |
| ΔPHASE <sub>1</sub> HFnu-RRI [%]                                  | -0.09     | 0.515           | -0.18     | 0.172           |
| ΔPHASE <sub>1</sub> PSD-RRI [ms <sup>2</sup> ]                    | 0.09      | 0.479           | -0.17     | 0.196           |
| ΔPHASE <sub>1</sub> LF/HF-RRI [1]                                 | 0.02      | 0.857           | 0.18      | 0.169           |
| ΔPHASE <sub>1</sub> LF/HF [1]                                     | 0.03      | 0.819           | 0.17      | 0.192           |
| ΔPHASE <sub>1</sub> LFnu-dBP [%]                                  | -0.15     | 0.25            | 0.1       | 0.461           |
| ΔPHASE <sub>1</sub> HFnu-dBP [%]                                  | -0.04     | 0.75            | -0.21     | 0.119           |
| ΔPHASE <sub>1</sub> PSD-dBP [mmHg <sup>2</sup> ]                  | 0.22      | 0.092           | 0         | 0.975           |
| ΔPHASE <sub>1</sub> LFnu-sBP [%]                                  | 0.15      | 0.266           | 0.1       | 0.445           |
| ΔPHASE <sub>1</sub> HFnu-sBP [%]                                  | 0.11      | 0.415           | -0.08     | 0.54            |
| ΔPHASE <sub>1</sub> PSD-sBP [mmHg <sup>2</sup> ]                  | -0.08     | 0.552           | 0.19      | 0.156           |
| ΔPHASE <sub>1</sub> BRS [ms/mmHg]                                 | 0.08      | 0.548           | -0.21     | 0.114           |
| ΔPHASE <sub>2</sub> HR [1/min]                                    | 0.09      | 0.516           | 0.14      | 0.286           |
| ΔPHASE <sub>2</sub> sBP [mmHg]                                    | 0.15      | 0.275           | 0.16      | 0.24            |
| ΔPHASE <sub>2</sub> dBP [mmHg]                                    | 0.15      | 0.251           | 0.18      | 0.169           |
| ΔPHASE <sub>2</sub> mBP [mmHg]                                    | 0.13      | 0.321           | 0.2       | 0.127           |
| ΔPHASE <sub>2</sub> CI [L/(min·m <sup>2</sup> )]                  | 0.04      | 0.746           | -0.1      | 0.466           |
| ΔPHASE <sub>2</sub> TPRI [dyn·s·m <sup>2</sup> /cm <sup>5</sup> ] | 0.15      | 0.269           | 0.13      | 0.349           |

|                                                                                      |       |              |       |              |
|--------------------------------------------------------------------------------------|-------|--------------|-------|--------------|
| $\Delta\text{PHASE}_2$ LFnu-RRI [%]                                                  | -0.02 | 0.863        | 0.15  | 0.269        |
| $\Delta\text{PHASE}_2$ HFnu-RRI [%]                                                  | 0.02  | 0.902        | -0.15 | 0.246        |
| $\Delta\text{PHASE}_2$ PSD-RRI [ $\text{ms}^2$ ]                                     | 0.02  | 0.853        | -0.26 | <b>0.047</b> |
| $\Delta\text{PHASE}_2$ LF/HF-RRI [1]                                                 | -0.31 | <b>0.016</b> | -0.07 | 0.596        |
| $\Delta\text{PHASE}_2$ LF/HF [1]                                                     | -0.36 | <b>0.005</b> | -0.07 | 0.613        |
| $\Delta\text{PHASE}_2$ LFnu-dBP [%]                                                  | -0.09 | 0.52         | 0.2   | 0.125        |
| $\Delta\text{PHASE}_2$ HFnu-dBP [%]                                                  | 0.12  | 0.365        | -0.22 | 0.099        |
| $\Delta\text{PHASE}_2$ PSD-dBP [ $\text{mmHg}^2$ ]                                   | 0.22  | 0.097        | -0.06 | 0.678        |
| $\Delta\text{PHASE}_2$ LFnu-sBP [%]                                                  | 0.17  | 0.199        | 0.12  | 0.375        |
| $\Delta\text{PHASE}_2$ HFnu-sBP [%]                                                  | 0.16  | 0.239        | -0.07 | 0.614        |
| $\Delta\text{PHASE}_2$ PSD-sBP [ $\text{mmHg}^2$ ]                                   | -0.06 | 0.657        | 0.09  | 0.494        |
| $\Delta\text{PHASE}_2$ BRS [ $\text{ms/mmHg}$ ]                                      | 0.08  | 0.524        | -0.23 | 0.079        |
| $\Delta\text{PHASE}_3$ HR [1/min]                                                    | 0.02  | 0.898        | 0.12  | 0.361        |
| $\Delta\text{PHASE}_3$ sBP [ $\text{mmHg}$ ]                                         | 0.13  | 0.314        | 0.13  | 0.317        |
| $\Delta\text{PHASE}_3$ dBP [ $\text{mmHg}$ ]                                         | 0.09  | 0.505        | 0.28  | <b>0.034</b> |
| $\Delta\text{PHASE}_3$ mBP [ $\text{mmHg}$ ]                                         | 0.09  | 0.477        | 0.24  | 0.073        |
| $\Delta\text{PHASE}_3$ CI [ $\text{L}/(\text{min}\cdot\text{m}^2)$ ]                 | 0.02  | 0.854        | -0.11 | 0.419        |
| $\Delta\text{PHASE}_3$ TPRI [ $\text{dyn}\cdot\text{s}\cdot\text{m}^2/\text{cm}^5$ ] | 0.12  | 0.386        | 0.12  | 0.354        |
| $\Delta\text{PHASE}_3$ LFnu-RRI [%]                                                  | 0.06  | 0.635        | 0.22  | 0.093        |
| $\Delta\text{PHASE}_3$ HFnu-RRI [%]                                                  | -0.06 | 0.635        | -0.22 | 0.093        |
| $\Delta\text{PHASE}_3$ PSD-RRI [ $\text{ms}^2$ ]                                     | -0.12 | 0.372        | -0.15 | 0.257        |
| $\Delta\text{PHASE}_3$ LF/HF-RRI [1]                                                 | -0.16 | 0.226        | 0.1   | 0.456        |
| $\Delta\text{PHASE}_3$ LF/HF [1]                                                     | -0.21 | 0.117        | 0.08  | 0.554        |
| $\Delta\text{PHASE}_3$ LFnu-dBP [%]                                                  | -0.14 | 0.31         | 0.13  | 0.341        |
| $\Delta\text{PHASE}_3$ HFnu-dBP [%]                                                  | -0.04 | 0.782        | -0.15 | 0.261        |
| $\Delta\text{PHASE}_3$ PSD-dBP [ $\text{mmHg}^2$ ]                                   | 0.15  | 0.252        | 0.04  | 0.771        |
| $\Delta\text{PHASE}_3$ LFnu-sBP [%]                                                  | 0.12  | 0.363        | 0.05  | 0.69         |
| $\Delta\text{PHASE}_3$ HFnu-sBP [%]                                                  | 0.04  | 0.764        | -0.03 | 0.819        |
| $\Delta\text{PHASE}_3$ PSD-sBP [ $\text{mmHg}^2$ ]                                   | 0.01  | 0.938        | 0.07  | 0.605        |
| $\Delta\text{PHASE}_3$ BRS [ $\text{ms/mmHg}$ ]                                      | 0.04  | 0.772        | -0.21 | 0.112        |
| $\Delta\text{PHASE}_4$ HR [1/min]                                                    | 0.06  | 0.644        | 0.11  | 0.417        |
| $\Delta\text{PHASE}_4$ sBP [ $\text{mmHg}$ ]                                         | 0.18  | 0.176        | 0.09  | 0.505        |
| $\Delta\text{PHASE}_4$ dBP [ $\text{mmHg}$ ]                                         | 0.21  | 0.109        | 0.28  | <b>0.034</b> |
| $\Delta\text{PHASE}_4$ mBP [ $\text{mmHg}$ ]                                         | 0.2   | 0.137        | 0.22  | 0.09         |
| $\Delta\text{PHASE}_4$ CI [ $\text{L}/(\text{min}\cdot\text{m}^2)$ ]                 | 0.04  | 0.781        | -0.07 | 0.606        |
| $\Delta\text{PHASE}_4$ TPRI [ $\text{dyn}\cdot\text{s}\cdot\text{m}^2/\text{cm}^5$ ] | 0.11  | 0.402        | 0.09  | 0.489        |
| $\Delta\text{PHASE}_4$ LFnu-RRI [%]                                                  | 0.04  | 0.762        | 0.24  | 0.07         |
| $\Delta\text{PHASE}_4$ HFnu-RRI [%]                                                  | -0.04 | 0.769        | -0.24 | 0.069        |
| $\Delta\text{PHASE}_4$ PSD-RRI [ $\text{ms}^2$ ]                                     | -0.09 | 0.521        | -0.23 | 0.081        |
| $\Delta\text{PHASE}_4$ LF/HF-RRI [1]                                                 | -0.17 | 0.214        | 0.11  | 0.416        |
| $\Delta\text{PHASE}_4$ LF/HF [1]                                                     | -0.26 | 0.045        | 0.05  | 0.736        |
| $\Delta\text{PHASE}_4$ LFnu-dBP [%]                                                  | -0.1  | 0.46         | 0.09  | 0.524        |
| $\Delta\text{PHASE}_4$ HFnu-dBP [%]                                                  | 0.01  | 0.961        | -0.19 | 0.157        |
| $\Delta\text{PHASE}_4$ PSD-dBP [ $\text{mmHg}^2$ ]                                   | 0.16  | 0.231        | -0.06 | 0.63         |
| $\Delta\text{PHASE}_4$ LFnu-sBP [%]                                                  | 0.14  | 0.287        | 0.11  | 0.429        |
| $\Delta\text{PHASE}_4$ HFnu-sBP [%]                                                  | 0.03  | 0.818        | -0.01 | 0.953        |
| $\Delta\text{PHASE}_4$ PSD-sBP [ $\text{mmHg}^2$ ]                                   | 0.03  | 0.84         | 0.04  | 0.76         |
| $\Delta\text{PHASE}_4$ BRS [ $\text{ms/mmHg}$ ]                                      | 0.13  | 0.337        | -0.21 | 0.116        |

HR—heart rate; sBP—systolic blood pressure; dBP—diastolic blood pressure; mBP—mean blood pressure; CI—cardiac index; TPRI—total peripheral index; LFnu-RRI—low frequency R-R interval; in normalized units; HFnu-RRI—high-frequency R-R interval in normalized units; PSD-RRI—power spectral density R-R interval; LF/HF—ratio between low and high band for heart rate and blood pressure variability; PSD-sBP—power spectral density of systolic blood pressure variability;

LFnu-sBP—low frequency of systolic blood pressure variability in normalized units; HFnu-sBP—high frequency of systolic blood pressure variability in normalized units; PSD-dBP—power spectral density of diastolic blood pressure variability; LFnu-dBP—low frequency of diastolic blood pressure variability in normalized units; HFnu-dBP—high frequency of diastolic blood pressure variability in normalized units; BRS—baroreflex sensitivity; ESS score – excessive daily sleepiness; CFQ score-fatigue severity;  $\Delta$ PHASE-baseline.
